# Supplementary material
Source: publisher figshare collection journal article supplement (https://gsapubs.figshare.com/ndownloader/files/25456094)
Supplement: Supplementary file 1 [file 25456094]

T.V. Naber, S.E. Grasby, J.P. Cuthbertson, N. Rayner, and C. Tegner, 2020, New constraints on the age, geochemistry and environmental impact of High Arctic Large Igneous Province magmatism: Tracing the extension of the Alpha Ridge onto Ellesmere Island, Canada: GSA Bulletin; <https://doi.org/10.1130/B35792.1>

## Supplemental Material

### Supplementary Data Files

1. Sample list and description
2. GPS positions of samples
3. Accuracy of major and trace element bulk rock compositions and precision of repeat analyses
4. Photomicrographs
5. Clinopyroxene, plagioclase and olivine compositions
6. SHRIMP U-Pb methods and results
7. Nb-Zr-Y tectonic discrimination diagram
8. Ti-Zr-Y tectonic discrimination diagram
9. Ti-V tectonic discrimination diagram
10.  $\text{MgO-FeO}^{\text{tot}}\text{-Al}_2\text{O}_3$  tectonic discrimination diagram
11. AFM diagram
12. Th/Nb vs.  $\text{SiO}_2$  diagram

### REFERENCES CITED

- Black, L.P., Kamo, S.L., Allen, C.M., Aleinikoff, J.A., Davis, D.W., Korsch, J.R., and Foudolis, C., 2003, TEMORA 1: a new zircon standard for Phanerozoic U-Pb geochronology: Chemical Geology, v. 200, p. 155–170, [https://doi.org/10.1016/S0009-2541\(03\)00165-7](https://doi.org/10.1016/S0009-2541(03)00165-7).
- Meschede, M., 1986, A method of discriminating between different types of mid-ocean ridge basalts and continental tholeiites with the Nb-Zr-Y diagram: Chemical Geology, v. 56, p. 207–218, [https://doi.org/10.1016/0009-2541\(86\)90004-5](https://doi.org/10.1016/0009-2541(86)90004-5).
- Pearce, J.A., and Cann, J.R., 1973, Tectonic setting of basic volcanic rocks determined using trace elemen. analyses: Earth and Planetary Science Letters, v. 19, p. 290–300, [https://doi.org/10.1016/0012-821X\(73\)90129-5](https://doi.org/10.1016/0012-821X(73)90129-5).
- Pearce, T.H., Gorman, B.E., and Birkett, T.C., 1977, The relationship between major element chemistry and tectonic environment of basic and intermediate volcanic rocks: Earth and Planetary Science Letters, v. 36, p. 121–132, [https://doi.org/10.1016/0012-821X\(77\)90193-5](https://doi.org/10.1016/0012-821X(77)90193-5).
- Stern, R.A., 1997, The GSC Sensitive High Resolution Ion Microprobe (SHRIMP): analytical techniques of zircon U-Th-Pb age determinations and performance evaluation: in Radiogenic Age and Isotopic Studies, Report, v. 10, Geological Survey of Canada, Current Research 1997-F, p. 1–31.
- Stern, R.A., and Amelin, Y., 2003, Assessment of errors in SIMS zircon U-Pb geochronology using a natural zircon standard and NIST SRM 610 glass: Chemical Geology, v. 197, p. 111–142, [https://doi.org/10.1016/S0009-2541\(02\)00320-0](https://doi.org/10.1016/S0009-2541(02)00320-0).
